# Supplementary material
Source: PubMed Central journal article supplement (PMC10516484)
Supplement: NIHMS1916725-supplement-Supplemental_Digital_Content_1.pdf [file NIHMS1916725-supplement-Supplemental_Digital_Content_1.pdf]

## Appendix 1. Interview Guide

1. Can you briefly describe your work addressing birth and maternal health equity for me?
  - a. *Prompt:* Is this clinical care improvement? a hospital or state or local community initiative? Education/curriculum? Research? training in bias? Other?
2. In your work, what are the structure and process measures around maternal health equity that are you measuring?
  - a. *Prompt:* What tool(s)/instrument(s) do you use? Are these being tested? Are they validated? Are there other measurement tools in this realm you can recommend?
  - b. *Prompt:* What time points are you measuring?
    - i. *Prompts:* prenatal, L&D, and/or postpartum inpatient and outpatient realms?
3. Have you conducted work around social determinants of health screening or measurement? If so, how did you do this?
4. Can you discuss your work in measuring or reporting patient experiences of racism?
  - a. *Prompt:* How have you supported hospital systems in doing this?
  - b. *Prompt:* How did you do this? Were there any champions of this work on the hospital side that helped to facilitate this?
5. What kinds of training around Respectful Maternity Care or Birth Equity have you been a part of?
  - a. *Prompt:* What was your role in this – leader, participant, researcher?
  - b. *Prompt:* Was the training for clinicians/providers or patients/families?
  - c. *Prompt:* What training platform did you use? Did you create your own?
  - d. *Prompt:* How was the efficacy of the training measured? (Example: cumulative or percent of staff quarterly or monthly? The number of participants? The number of communities served? Pre and post-surveys?)
6. Are there other initiatives, research, or clinician training you have been a part of around birth equity work that we have not already discussed?
7. What are areas of measurement of maternal and birth equity that are important but are not happening?
8. What do you see as the future of this work? How do you suggest getting there?
9. How has your work been received?
  - a. *Prompt:* What were the barriers have you encountered?
  - b. *Prompt:* What were the facilitators that helped the process?

Kheyfets A, Vitek K, Conklin C, Tu C, Larson E, Zera C, et al. Selecting measures for a maternal equity safety bundle to eliminate racial inequities across labor and delivery units in Massachusetts. *Obstet Gynecol* 2023;142.

The authors provided this information as a supplement to their article.

©2023 American College of Obstetricians and Gynecologists.

Page 1 of 8

## Appendix 2. Codes and Subcodes

| <b>Codes</b>                                      | <b>Subcodes</b>                                                                                                                                                                                                                                                   |
|---------------------------------------------------|-------------------------------------------------------------------------------------------------------------------------------------------------------------------------------------------------------------------------------------------------------------------|
| Bundle Implementation Factors                     | Buy-In from Non-Academic Hospitals<br>Changing Culture<br>System-Level Work<br>Geography<br>Implementation<br>Reporting<br>Standardization                                                                                                                        |
| Community                                         | Patient Advisory Council                                                                                                                                                                                                                                          |
| Literature/Expert Recommendations                 |                                                                                                                                                                                                                                                                   |
| MMRCs/MMRIA                                       | Flawed Maternal Death Measures<br>MMRIA<br>Pregnancy-associated Deaths                                                                                                                                                                                            |
| Measurement of Outcomes, Structures and Processes | Documenting Inequity<br>Childbirth Experience Measurement<br>Needed in Measurement <input type="checkbox"/> Future of this Work<br>Measurement re: MM and SMM<br>Measurement Timepoints<br>Racial Disparities<br>Readiness Assessment<br>Stratifying Data by Race |
| Patient Experience Measurement                    | Measuring Racism - MADM, MORI, Listening to Mothers, Barriers, Champions<br>Patient Experience Scales - Press Gainey, HCAP, Net Promoter                                                                                                                          |
| Research Focuses                                  | Qualitative Research<br>Non-racial Disparities/Inequities<br>Presenting Research Rigorously<br>Life-course Approach<br>Quality Improvement<br>Researching Inequity                                                                                                |
| SDOH Screening                                    | NowPow Tool<br>Different Levels of SDOH Risk<br>Methods of SDOH Screening - ACIS, PREPARE<br>Referrals for Social Services<br>Screening via EMRs/Apps                                                                                                             |
| Staffing & Clinician Related Factors              | OB/GYNs<br>Engaging Nurses<br>Nurse Staffing<br>Diversity<br>Communication                                                                                                                                                                                        |
| Systems & Institutions                            | ACOG<br>Connecting to DPHs                                                                                                                                                                                                                                        |

Keyfets A, Vitek K, Conklin C, Tu C, Larson E, Zera C, et al. Selecting measures for a maternal equity safety bundle to eliminate racial inequities across labor and delivery units in Massachusetts. *Obstet Gynecol* 2023;142.

The authors provided this information as a supplement to their article.

©2023 American College of Obstetricians and Gynecologists.

|                                         |                                                                                           |
|-----------------------------------------|-------------------------------------------------------------------------------------------|
|                                         | Policy Advocacy                                                                           |
| Trainings & Education                   | Respectful Maternity Care Trainings<br>Training and Education around Equity/Implicit Bias |
| Work Received, Barriers, & Facilitators | How was the Work Received<br>Barriers to Work<br>Facilitators of Works                    |

Khefets A, Vitek K, Conklin C, Tu C, Larson E, Zera C, et al. Selecting measures for a maternal equity safety bundle to eliminate racial inequities across labor and delivery units in Massachusetts. *Obstet Gynecol* 2023;142.

The authors provided this information as a supplement to their article.

©2023 American College of Obstetricians and Gynecologists.

### Appendix 3. Instructions for Maternal Equity Bundle Process Measures

Please answer the following process measure questions using data from [month]. All process measures are collected monthly. You will have the opportunity to provide any additional details about your answers at the end of this section.

Our goal is to understand at what rate teams are educating staff on racial inequities in adverse maternal health outcomes, including racism as a cause of disparities, standards of care, QI methods to ameliorate inequities, etc. An educational program is a multidisciplinary, on-unit or virtual, interactive learning program or training.

#### P1. Education on Bias and Respectful Care

P1a. At the end of [data\_month] [data\_year], approximately what cumulative proportion of **OB physicians, OB anesthesiologists, and midwives (including OB residents, OB ANES fellows, and MFM fellows)** have completed a training, within the last 2 years, that includes education on implicit bias, racism, and racial disparities (e.g. SPEAK UP Implicit & Explicit Racial Bias Education)?

**0%, 10%, 20%, 30%, 40%, 50%, 60%, 70%, 80%, 90%, 100%**

P1b. At the end of [data\_month] [data\_year], approximately what cumulative proportion of **OB nurses** have completed a training, within the last 2 years, that includes education on implicit bias, racism, and racial disparities (e.g., SPEAK UP)?

**0%, 10%, 20%, 30%, 40%, 50%, 60%, 70%, 80%, 90%, 100%**

For the following measures, please conduct a chart review of **Non-Hispanic Black birthing individuals** with persistent (twice within 15 minutes) new-onset Severe HTN (Systolic:  $\geq 160$ , Diastolic:  $\geq 110$ ), excluding birthing people with an exacerbation of chronic HTN in [data\_month] [data\_year].

***NOTE: If you had 10 or fewer births this month, please review ALL charts. If you had more than 10, please take a random sample using the instructions below:***

1. Divide the total number of live births occurring at your facility in a given month by 10.
2. Select every nth chart where n is the result of that division.

**Example 1: If your hospital has 102 births in a month, divide 102 by 10 (= 10.2). You will select every 10th birth for that month.**

**Example 2: If your hospital has 28 births in a month, divide 28 by 10 (= 2.8). You will select every 2nd birth for that month.**

#### P2. Total Births

In [data\_month] [data\_year], how many live births occurred on your labor unit?

#### Enter integer

Kheyfets A, Vitek K, Conklin C, Tu C, Larson E, Zera C, et al. Selecting measures for a maternal equity safety bundle to eliminate racial inequities across labor and delivery units in Massachusetts. *Obstet Gynecol* 2023;142.

The authors provided this information as a supplement to their article.

©2023 American College of Obstetricians and Gynecologists.

P3. Severe Hypertension Among Non-Hispanic Black Birthing People (NHB)

P3a. In [data\_month] [data\_year], how many NHB birthing people had persistent (twice within 15 minutes) new-onset Severe HTN (Systolic:  $\geq 160$ , Diastolic:  $\geq 110$ ), excluding birthing people with an exacerbation of chronic HTN)?

**Enter integer**

P3b. Among those [p4\_a\_eqt], how many birthing people were treated within 1 hour (60 minutes) with IV Labetalol, IV Hydralazine, or PO Nifedipine?

**Enter integer**

Among those [p4\_a\_eqt], how many NHB birthing people with new hypertension:

P3c.1. Received preeclampsia education at discharge?

**Enter integer**

P3c.2. Had a postpartum blood pressure check scheduled with a provider or home visiting nurse within 72 hours of discharge?

**Enter integer**

P3c.3. Had a follow-up appointment with an obstetric provider scheduled within 10 days of discharge?

**Enter integer**

P3c.4. Received a nurse home visiting referral at discharge?

**Enter integer**

For the following measures, please conduct a chart review of **Non-Hispanic White birthing individuals** with persistent (twice within 15 minutes) new-onset Severe HTN (Systolic:  $\geq 160$ , Diastolic:  $\geq 110$ ), excluding birthing people with an exacerbation of chronic HTN in [data\_month] [data\_year].

***NOTE: If you had 10 or fewer births this month, please review ALL charts. If you had more than 10, please take a random sample using the instructions below:***

1. Divide the total number of live births occurring at your facility in a given month by 10.
2. Select every nth chart where n is the result of that division.

**Example 1: If your hospital has 102 births in a month, divide 102 by 10 (= 10.2). You will select every 10th birth for that month.**

**Example 2: If your hospital has 28 births in a month, divide 28 by 10 (= 2.8). You will**

Kheyfets A, Vitek K, Conklin C, Tu C, Larson E, Zera C, et al. Selecting measures for a maternal equity safety bundle to eliminate racial inequities across labor and delivery units in Massachusetts. *Obstet Gynecol* 2023;142.

The authors provided this information as a supplement to their article.

**select every 2nd birth for that month.**

P4. Severe Hypertension Among Non-Hispanic White Birthing People (NHW)

P4a. In [data\_month] [data\_year], how many NHW birthing people had persistent (twice within 15 minutes) new-onset Severe HTN (Systolic: >160, Diastolic: >110), excluding birthing people with an exacerbation of chronic HTN)?

**Enter integer**

P4b. Among those [p5\_a\_eqt], how many birthing people were treated within 1 hour (60 minutes) with IV Labetalol, IV Hydralazine, or PO Nifedipine?

**Enter integer**

Among those [p5\_a\_eqt], how many NHW birthing people with new hypertension:

P4c.1. Received preeclampsia education at discharge?

**Enter integer**

P4c.2. Had a postpartum blood pressure check scheduled with a provider or home visiting nurse within 72 hours of discharge?

**Enter integer**

P4c.3. Had a follow-up appointment with an obstetric provider scheduled within 10 days of discharge?

**Enter integer**

P4c.4. Received a nurse home visiting referral at discharge?

**Enter integer**

For the following measures, please conduct a chart review of **Non-Hispanic Black birthing individuals** who delivered at your hospital during [data\_month] [data\_year].

***NOTE: If you had 10 or fewer births this month, please review ALL charts. If you had more than 10, please take a random sample using the instructions below:***

1. Divide the total number of live births occurring at your facility in a given month by 10.
2. Select every nth chart where n is the result of that division.

**Example 1: If your hospital has 102 births in a month, divide 102 by 10 (= 10.2). You will select every 10th birth for that month.**

**Example 2: If your hospital has 28 births in a month, divide 28 by 10 (= 2.8). You will select every 2nd birth for that month.**

Kheyfets A, Vitek K, Conklin C, Tu C, Larson E, Zera C, et al. Selecting measures for a maternal equity safety bundle to eliminate racial inequities across labor and delivery units in Massachusetts. *Obstet Gynecol* 2023;142.

The authors provided this information as a supplement to their article.

©2023 American College of Obstetricians and Gynecologists.

P5. Obstetric Hemorrhage Among Non-Hispanic Black Birthing People (NHB)

P5a. In [data\_month] [data\_year], how many NHB birth admissions occurred at your site?

**Enter integer**

P5b. Among those [p6\_a\_eqt], how many NHB birth admissions had a hemorrhage risk assessment completed with risk level assigned, performed at least once between admission and birth?

**Enter integer**

P5c. Among those [p6\_a\_eqt], how many NHB birth admissions had measurement of blood loss from birth through the recovery period using quantitative and cumulative techniques?

**Enter integer**

For the following measures, please conduct a chart review of **Non-Hispanic White birthing individuals** who delivered at your hospital during [data\_month] [data\_year].

***NOTE: If you had 10 or fewer births this month, please review ALL charts. If you had more than 10, please take a random sample using the instructions below:***

1. Divide the total number of live births occurring at your facility in a given month by 10.
2. Select every nth chart where n is the result of that division.

**Example 1: If your hospital has 102 births in a month, divide 102 by 10 (= 10.2). You will select every 10th birth for that month.**

**Example 2: If your hospital has 28 births in a month, divide 28 by 10 (= 2.8). You will select every 2nd birth for that month.**

P6. Obstetric Hemorrhage Among Non-Hispanic White Birthing People (NHW)

P6a. In [data\_month] [data\_year], how many NHW birth admissions occurred at your site?

**Enter integer**

P6b. Among those [p7\_a\_eqt], how many NHW birth admissions had a hemorrhage risk assessment completed with risk level assigned, performed at least once between admission and birth?

**Enter integer**

P6c. Among those [p7\_a\_eqt], how many NHW birth admissions had measurement of blood loss from birth through the recovery period using quantitative and cumulative

Kheyfets A, Vitek K, Conklin C, Tu C, Larson E, Zera C, et al. Selecting measures for a maternal equity safety bundle to eliminate racial inequities across labor and delivery units in Massachusetts. *Obstet Gynecol* 2023;142.

The authors provided this information as a supplement to their article.

©2023 American College of Obstetricians and Gynecologists.

techniques?

**Enter integer**

P7. Please use this space if you would like to provide any additional details on the above process measures. [**open-ended**; text box; not required]
