# Supplementary material
Source: PubMed Central journal article supplement (PMC10516484)
Supplement: NIHMS1916725-supplement-Supplemental_Digital_Content_3.pdf [file NIHMS1916725-supplement-Supplemental_Digital_Content_3.pdf]

## Positionality Statement

Our diverse and interdisciplinary team was composed of 17 individuals at varying stages in their career. 15/17 (88.2%) identified as female, and 2/17 (11.8%) identified as male. The team included two (11.8%) medical students, one resident (5.9%) physician in Obstetrics & Gynecology, eight (47.1%) attending physicians all specializing in Obstetrics & Gynecology, five (29.4%) of whom subspecialized in Maternal Fetal Medicine, three (17.6%) nursing colleagues, two (11.8%) have doctorates in public health-related fields and one (5.9%) as a public health professional with an MPH. Three (17.6%) identified as African American/Black, two (11.8%) identified as Asian and White, 13 (76.5%) identified as White. Two (11.8%) identify as immigrants and two (11.8%) as first-generation born in the U.S. This team was representative of the clinicians who are and will be implementing this bundle across birthing hospitals in Massachusetts. We acknowledge that the majority of the team identified as White, and those who did consistently considered their role in perpetuating racial inequities and duty to center the voices of Black leaders in our work. This was done through the leadership of this project by AM, NAO, and HD, three Black/African American identifying females, the literature we included, and diverse interview participants. Interview participants were diverse in identity and training, representing the racial minority groups affected by these inequities and leading scholarly projects in eliminating racial inequities in maternal health across various disciplines and socioecological levels. The PNQIN Equity Working Group includes patient representatives, nursing, physician, and student leaders from diverse racial, ethnic and socioeconomic backgrounds. The authors, interview participants and the PNQIN Equity Working Group all contributed to the development of the bundle and associated measures by centering the insidious role of racism in maternal health and how to combat it through evidence-based strategies supported by lived experiences of those most affected.

Kheyfets A, Vitek K, Conklin C, Tu C, Larson E, Zera C, et al. Development of a maternal equity safety bundle to eliminate racial inequities in Massachusetts. *Obstet Gynecol* 2023;142.

The authors provided this information as a supplement to their article.

©2023 The Authors.

Page 1 of 1
